# Supplementary material for: mRuby, a Bright Monomeric Red Fluorescent Protein for Labeling of Subcellular Structures
Source: PubMed Central journal article supplement (PMC2633614; doi:10.1371/journal.pone.0004391), 2009-02-05
Supplement: pone.0004391.s001.pdf [file pone.0004391.s001.pdf]

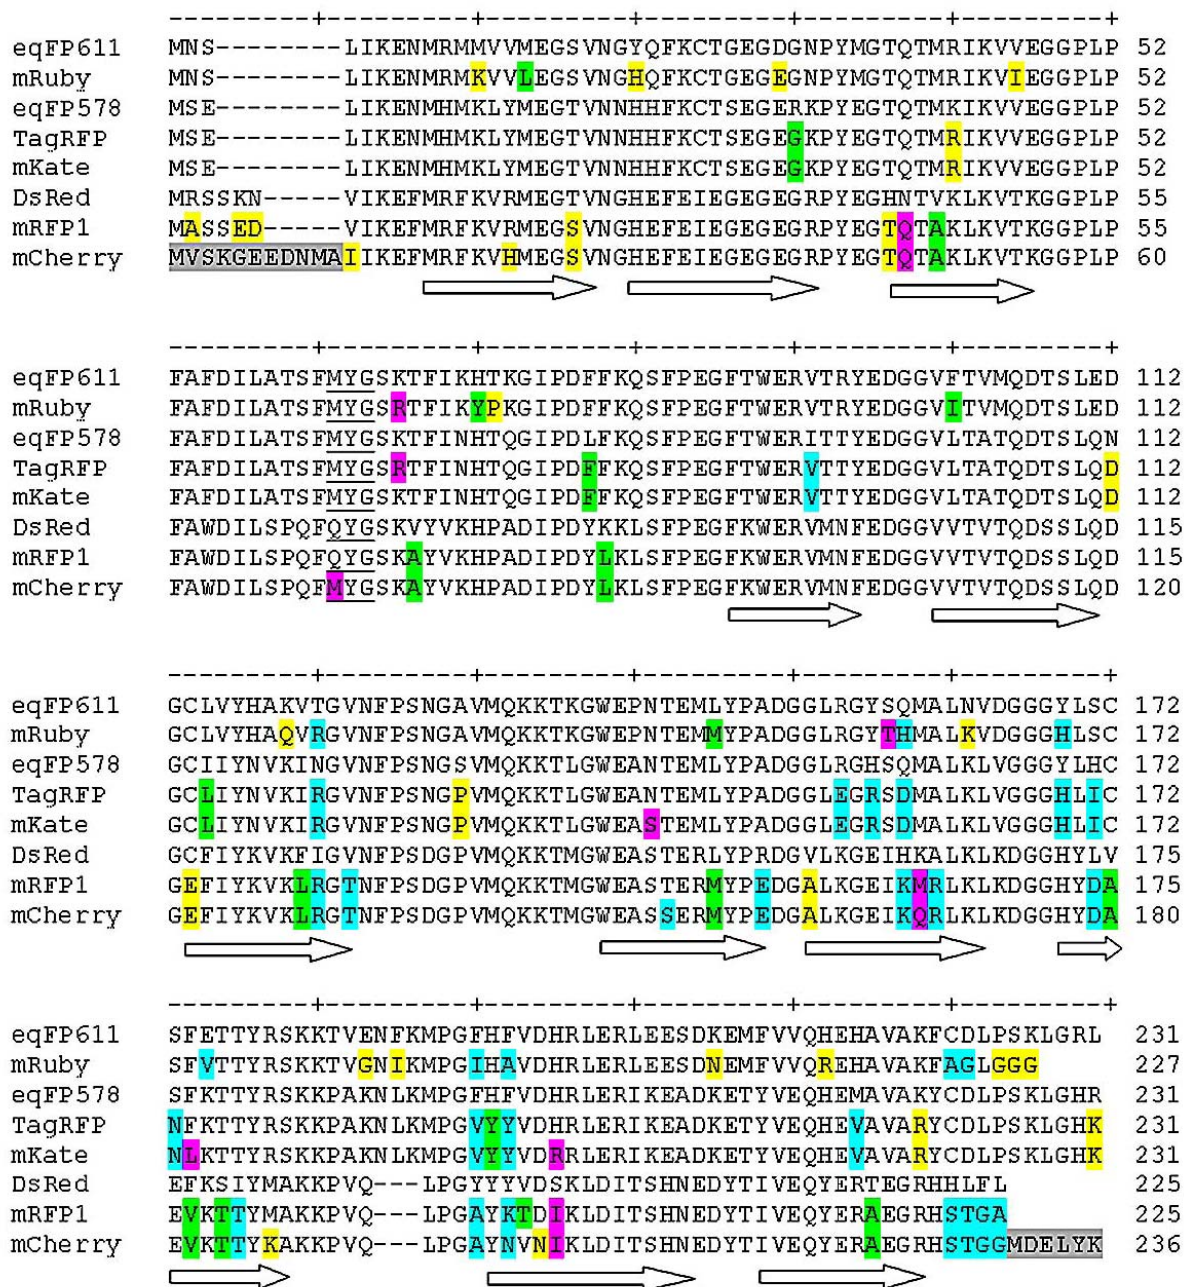

**Supplemental Figure 1. Multiple-sequence alignment of monomeric RFPs and their tetrameric predecessors. Modified amino acid residues are highlighted in different colors; cyan: residues involved in interface interactions; green: residues in the interior of the  $\beta$ -can; magenta: residues interacting with the chromophore; yellow: external residues; gray: GFP-termini of mCherry. The chromophore is underlined;  $\beta$ -strands are indicated by arrows.**
