# Supplementary material for: mRuby, a Bright Monomeric Red Fluorescent Protein for Labeling of Subcellular Structures
Source: PLoS One. 2009 Feb 5;4(2):e4391. doi: 10.1371/journal.pone.0004391 (PMC2633614; doi:10.1371/journal.pone.0004391)
Supplement: Table S1 — Supplemental table S1 online (0.02 MB DOC) [file pone.0004391.s004.doc]

**Supplemental table 1: Peroxisomal localization of monomeric eqFP611 variants with different C-terminal sequences in HEK293 cells.**

| C-terminal sequence                                       | Peroxisomal localization <sup>a</sup> |                       |
|-----------------------------------------------------------|---------------------------------------|-----------------------|
|                                                           | 24 h posttransfection                 | 48 h posttransfection |
| -216HAVAKFCDLPSKLGRL <sub>231</sub> <sup>b</sup>          | ++++++                                | ++++++                |
| -216HAVAK <b>HSGL</b> L <sub>225</sub> <sup>c</sup>       | +++++ -                               | +++++ -               |
| -216HAVAK <b>HSGL</b> L <sub>224</sub> <sup>c</sup>       | +++ - - -                             | +++ - - -             |
| -216HAVAKF <b>AGL</b> L <sub>224</sub> <sup>c</sup>       | - - - - -                             | ++ - - - -            |
| -216HA <b>EAQFSG</b> L <sub>225</sub> <sup>c</sup>        | - - - - -                             | + - - - - -           |
| -216HAVAK <b>HSG</b> L <sub>223</sub> <sup>c</sup>        | - - - - -                             | - - - - -             |
| -216HAVAK <b>HSGGG</b> L <sub>225</sub> <sup>c</sup>      | - - - - -                             | - - - - -             |
| -216HA <b>EAQFSG</b> L <sub>223</sub> <sup>c</sup>        | - - - - -                             | - - - - -             |
| -216HAVAKFCDL <sub>224</sub>                              | - - - - -                             | - - - - -             |
| -216HAVAKF <b>AGGG</b> L <sub>225</sub> <sup>c</sup>      | - - - - -                             | - - - - -             |
| -216HAVAKF <b>AGLGGG</b> L <sub>227</sub> <sup>c, d</sup> | - - - - -                             | - - - - -             |

<sup>a</sup> Rating based on the co-localization with EGFP-SKL from complete (++++++) to absent (- - - - -)

<sup>b</sup> C-terminal sequence of wild-type eqFP611

<sup>c</sup> Residues deviating from the C-terminal sequence of wild-type eqFP611 are highlighted in red.

<sup>d</sup> C-terminal sequence of mRuby
